# Supplementary material for: Stimulation of hepatocarcinogenesis by neutrophils upon induction of oncogenic kras expression in transgenic zebrafish
Source: PubMed Central journal article supplement (PMC4508360; doi:10.1016/j.jhep.2015.03.024), 2015-08
Supplement: mmc1.pdf [file mmc1.pdf]

**Supplementary data to:**

**Stimulation of hepatocarcinogenesis by neutrophils upon induction of  
oncogenic *kras* expression in transgenic zebrafish**

Chuan Yan<sup>1,2,§</sup>, Xiaojing Huo<sup>1,§</sup>, Shu Wang<sup>1</sup>, Yi Feng<sup>3</sup>, Zhiyuan Gong<sup>1,2,\*</sup>

**Table of Content**

Supplementary Materials and Methods

Supplementary Table 1

Supplementary Fig. 1

Supplementary Fig. 2

Supplementary Fig. 3

Supplementary Fig. 4

Supplementary Fig. 5

## Supplementary Materials and Methods

### *Morpholino knock-down and Tgf- $\beta$ depletion*

For knockdown of Gcsfr and Irf8, previously validated morpholinos targeting each gene's splice-site respectively, MO-gcsfr (5'-GAAGCACAAGCGAGACGGATGCCAT-3') (1) and MO-irf8 (5'-AATGTTTCGCTTACTTTGAAAATGG-3') (2), were used. A standard control morpholino, MO-SC, (5'-CCTCTTACCTCAGTTACAATTTATA-3') targeting a human beta-globin intron (Gene Tools, Philomath, OR), was used as a negative control. Aliquots of morpholino (1 mM) and 1% (wt/vol) phenol red in Danieau solution were injected into embryos at the 1-cell stage. Doxycycline was added to all larvae from 3 dpf to 6 dpf. For Tgf- $\beta$  depletion, antibody against zebrafish Tgf- $\beta$ 1 (Anaspec, 55450) was injected into 3-dpf *kras*<sup>+</sup> larvae (1:100 dilution) at the anterior end of yolk.

### *Photography and image analysis*

At each time point of chemical treatment, morpholino knockdown and antibody depletion experiments, 15-20 larvae of each group were randomly chosen for imaging. The larvae were anesthetized in 0.08% tricaine (Sigma, E10521) and immobilized in 3% methylcellulose (Sigma, M0521). Each larva was photographed separately using a confocal microscope (Carl Zeiss LSM510). 2D measurement of liver sizes was performed using ImageJ as previously described (3, 4) and neutrophils counted manually. Neutrophils in the trunk region from somites 1-4 were also counted as controls and we found no significant variations among all experimental conditions in this project (Supplementary Fig. 4). Time-lapse confocal microscopy was conducted on 8-dpf larvae embedded in 3% low-melting-point agarose and the time-lapse videos

were used for neutrophil tracking with multi-particle tracking by Imaris version 7.2.3 (Bitplane Scientific Software).

#### *Isolation of hepatocytes and neutrophils by FACS*

To enrich the TANs and liver cells, central part of 8-dpf larvae (after removal of the head and tail regions) were used for FACS using a cell sorter (BD Aria, 643245). The liver-enriched central parts were dissociated into single cells using a 40- $\mu$ m mesh (BD falcon, 352340) and enzymatically digested with 0.05% trypsin (Sigma, T1426), as previously described (5). GFP+ oncogenic hepatocytes and Ds-Red+ TANs were isolated from doxycycline-induced *kras+ /lyz+* transgenic larvae, while non-oncogenic control hepatocytes and NNs were isolated respectively from *fabp10+* and *kras- /lyz+* control larvae based on Ds-Red expression.

#### *RNA extraction, cDNA amplification and RT-qPCR (reverse transcription-quantitative PCR)*

Total RNA was extracted using RNeasy mini kit (Qiagen, 74104). A total of 5 ng RNA was used as a template to synthesize and amplify cDNA using QuantiTect Whole Transcriptome Kit (Qiagen, 207043). Amplified cDNA was carried out for real-time quantitative PCR with LightCycler 480 SYBR Green I Master (Roche, 04707516001). Interested genes were amplified by 40 cycles (95°C, 20 seconds; 65°C, 15 seconds; 72°C, 30 seconds). The sequences of primers used are presented in Supplementary Table 1. *Kras-EGFP* expression under various experimental conditions was measured by RT-qPCR and there was no significant change of the expression observed (Supplementary Fig. 5).

### *Histological and cytological analyses*

8-dpf larvae were fixed in 4% paraformaldehyde in phosphate buffered saline (Sigma, P6748) and paraffin-sectioned at 5  $\mu$ m thickness using a microtome, followed by hematoxylin and eosin (H&E) staining or immunohistochemistry. For immunohistochemistry, the primary antibody was rabbit anti-PCNA (Santa Cruz, FL-261), anti-caspase 3 (BD biosciences, C92-065), anti-SMAD2 (Invitrogen, 700048), anti-phosphosmad2 (Millipore, 04-953), anti-collagen 1 (Abcam, ab23730) and anti-laminin (Thermo, RB-082). Giemsa staining was performed on isolated neutrophils were fixed in 100% methanol and subsequently stained with Giemsa (Sigma, GS500).

### **References**

1. Feng Y, Renshaw S, Martin P. Live Imaging of Tumor Initiation in Zebrafish Larvae Reveals a Trophic Role for Leukocyte-Derived PGE<sub>2</sub>. *Current Biology* 2012;22:1253-1259.
2. Li L, Jin H, Xu J, Shi Y, Wen Z. Irf8 regulates macrophage versus neutrophil fate during zebrafish primitive myelopoiesis. *Blood* 2011;117:1359-1369.
3. Huang X, Zhou L, Gong Z. Liver tumor models in transgenic zebrafish: an alternative in vivo approach to study hepatocarcinogenesis. *Future Oncol* 2012;8:21-28.
4. Li Z, Zheng W, Wang Z, Zeng Z, Zhan H, Li C, Zhou L, et al. A transgenic zebrafish liver tumor model with inducible Myc expression reveals conserved Myc signatures with mammalian liver tumors. *Dis Model Mech* 2013;6:414-423.
5. Manoli M, Driever W. Fluorescence-activated cell sorting (FACS) of fluorescently tagged cells from zebrafish larvae for RNA isolation. *Cold Spring Harb Protoc* 2012;2012.

**Supplementary Table 1. Sequences of RT-qPCR primers**

| Gene symbol      | Forward primer sequence (5'->3') | Reverse primer sequence (5'->3') |
|------------------|----------------------------------|----------------------------------|
| <i>tnfa</i>      | CGTCTGCTTCACGCTCCATA             | GATGTGCAAAGACACCTGGC             |
| <i>ifng1-1</i>   | ACAGATTTTCGACGGTCCAGG            | CCAATCCTTTGCAAGCGTGT             |
| <i>tgf-β1a</i>   | AGCAGAATTGCGTCTTCGGA             | TCAAATGAGAGCCAGCGGTT             |
| <i>il1b</i>      | GCCTGTGTGTTTGGGAATCT             | TGATAAACCAACCGGGACAT             |
| <i>il4</i>       | TCTCTGCCAAGCAGGAATGG             | TTCATTGTGCATTCCCCCGA             |
| <i>il6</i>       | ATGACGGCATTGGAAGGGGT             | TCAGGACGCTGTAGATTTCGC            |
| <i>il8</i>       | GCGACAGCGTGGATCTACAG             | GGCATTACACCCAAAGCG               |
| <i>il10</i>      | CACAACCCCAATCGACTCCA             | GAGCAAATCAAGCTCCCCCA             |
| <i>il12</i>      | AGGGCTCTTCGTTTGACGAC             | TGTCATGCGGTGGTGTAGTG             |
| <i>egfp-kras</i> | CCGCCCTGAGCAAAGACCCC             | AGCGGTGTCCTTTCAATGAG             |

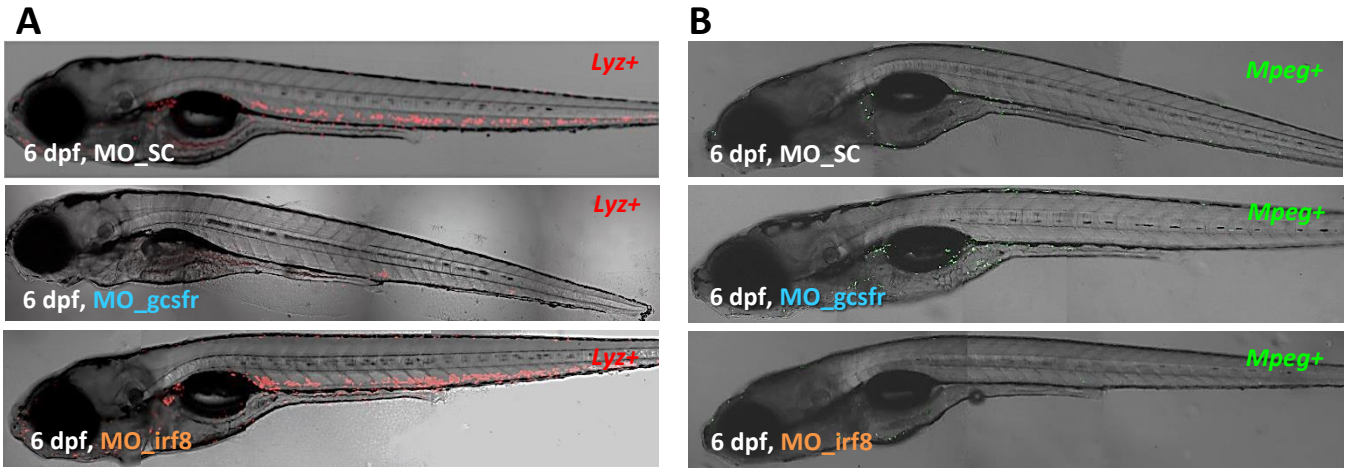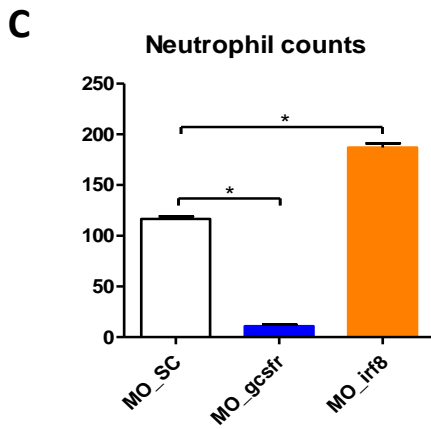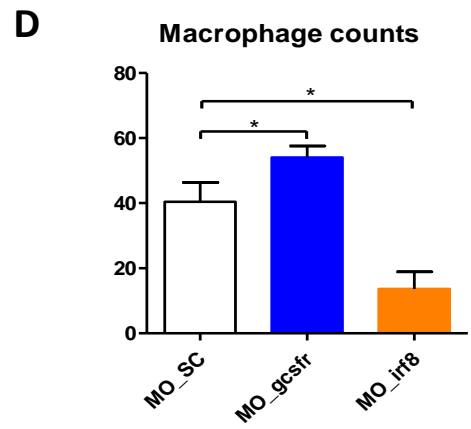

**Supplementary Fig. 1. Effect of morpholino knockdown of Gcsfr and Irf8.** (A) 6-dpf *lyz*<sup>+</sup> larvae injected with morpholinos MO-SC (top), MO-gcsfr (middle) or MO\_irf8 (bottom). (B) 6-dpf *mpeg*<sup>+</sup> larvae injected with morpholinos MO-SC (top), MO-gcsfr (middle) or MO\_irf8 (bottom). (C) Quantification of number of neutrophils per larva. (D) Quantification of number of microphages per larva. (n=5, \*p<0.05).

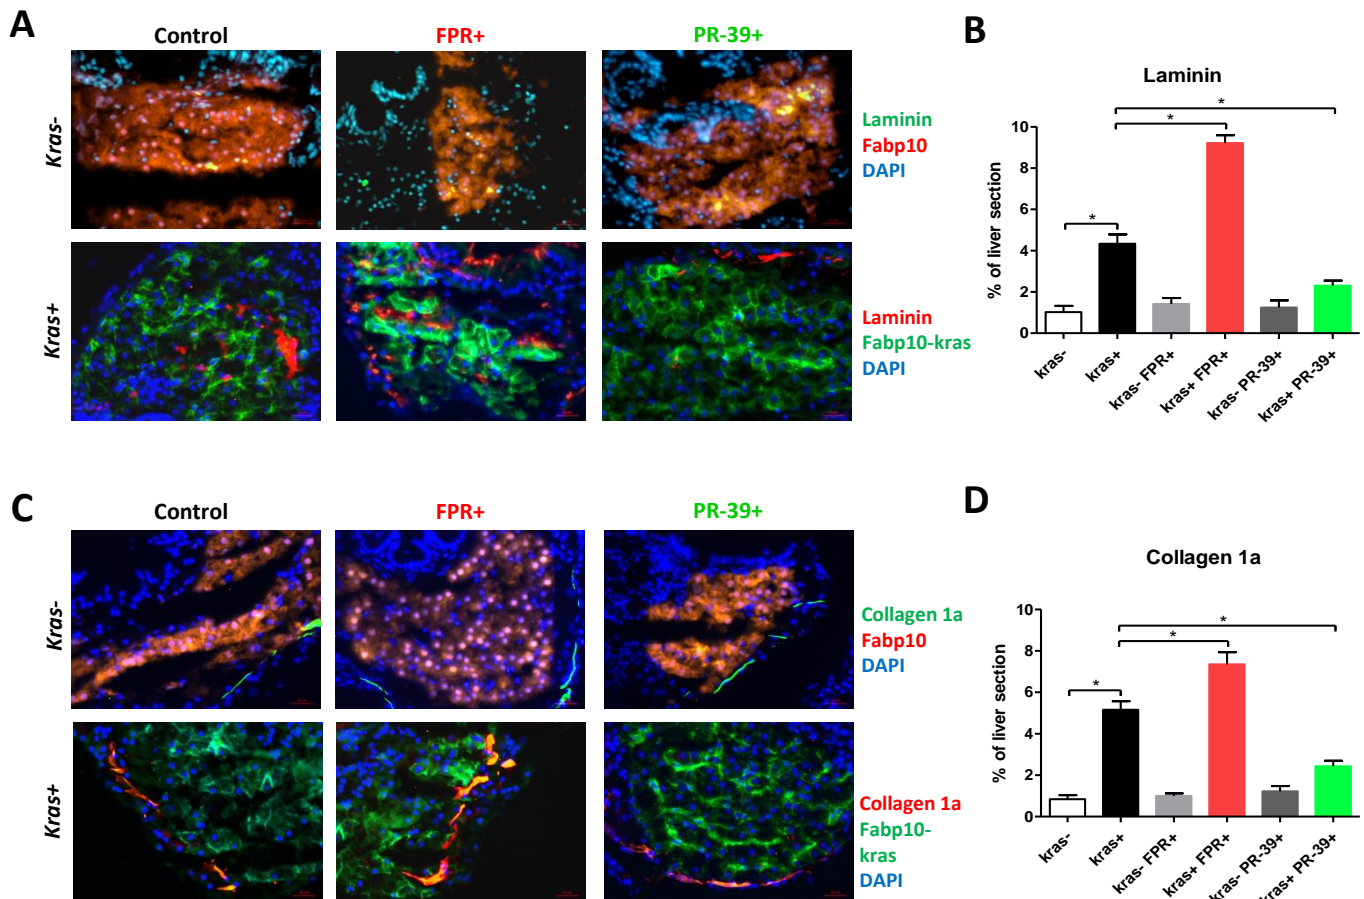

**Supplementary Fig. 2. Effect of neutrophil infiltration on expression of Laminin and collagen I in the liver.** 8-dpf *fabp10*<sup>+</sup> and *kras*<sup>+</sup> larvae after exposure to FPR-A14 or PR-39 with or without doxycycline were cryo-sectioned and immune-stained for Laminin and Collagen I expression. (A, B) Immuno-staining for Laminin (A) and quantification (B). (C, D) Immuno-staining for Collagen 1a (C) and quantification (D). Control *fabp10*<sup>+</sup> larvae with DsRed expression in hepatocytes were stained with Alexa Fluor 488-conjugated secondary antibody after the primary antibody incubation (top rows) while *kras*<sup>+</sup> larvae with GFP expression in hepatocytes were stained with Alexa Fluor 568-conjugated secondary antibody (bottom rows). All sections were counter-stained with DAPI. Treatment groups (n=10 each group) and color probes are indicated at the top and on the right respectively. Quantification of percentage of Laminin- or collagen I-positive areas out of total liver area is presented in (C) and (D). Statistical significance in quantification: \*p<0.05.

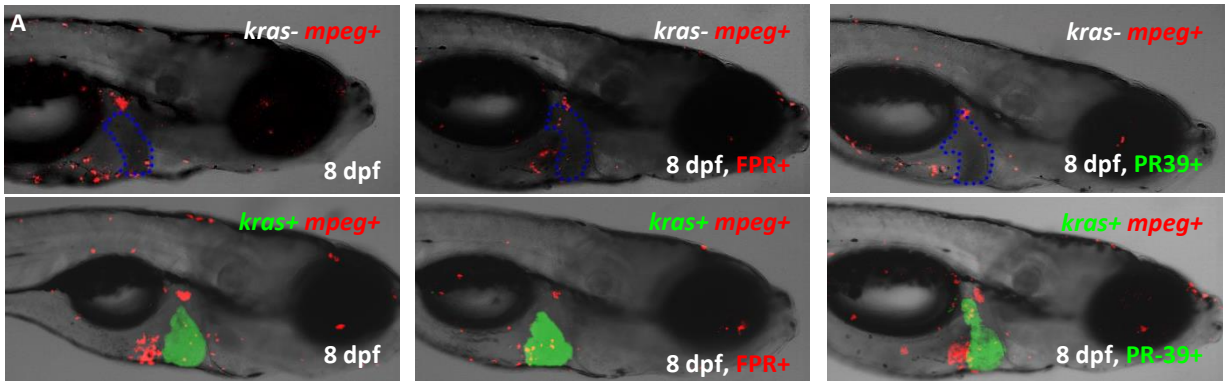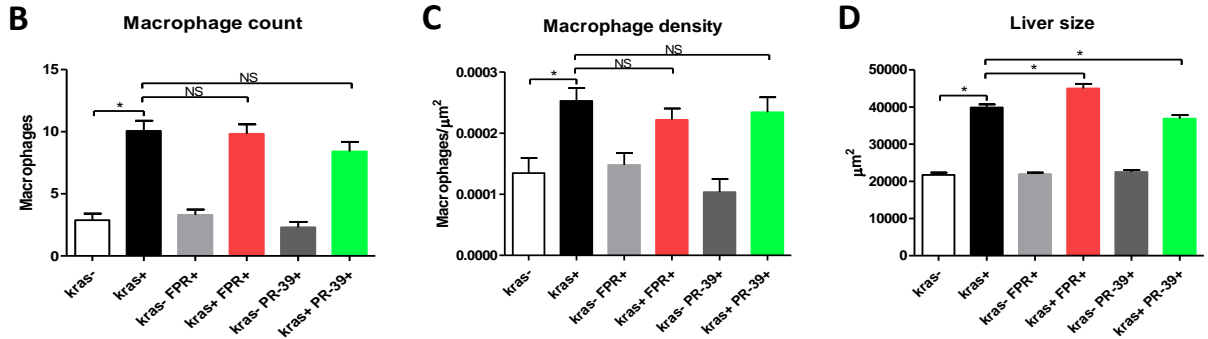

**Supplementary Fig. 3. Lack of effect of FPRA14 and PR-39 on macrophages. (A)**

Representative images of 8-dpf *kras-/mpeg+* (top row) and *kras+/mpeg+* (bottom row) larvae treated with doxycycline alone (left), FPR-A14 and doxycycline ( middle) or PR-39 and doxycycline ( right) as indicated. Livers in *kras-* larvae are outlined. (B-D) Macrophage counts (B) and density (C) in the liver and liver size (D) after chemical treatment in the larvae (n>17 in each group). Statistical significant: \*p<0.05.



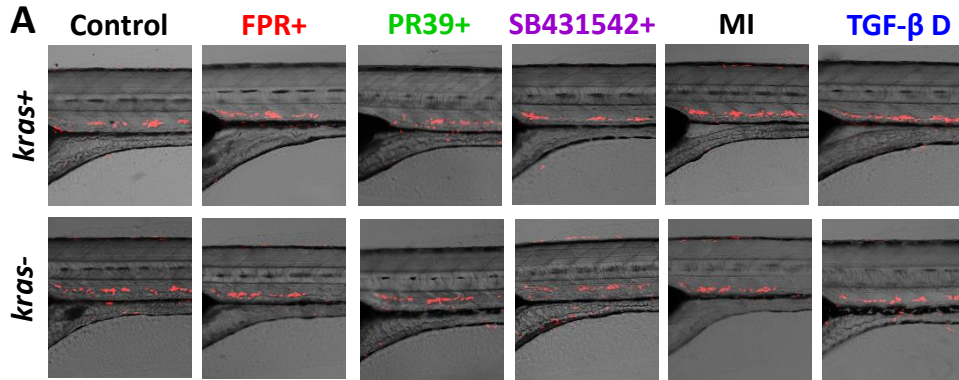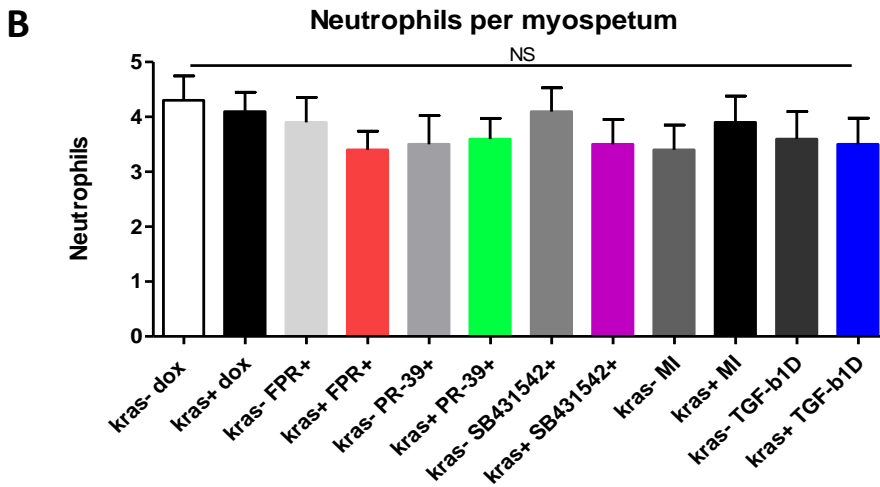

**Supplementary Fig. 4. Lack of significant changes of neutrophil numbers under various experimental conditions.** To support the specific changes of neutrophil numbers in the livers in various experimental conditions, the number of neutrophils were quantitated in the trunk region (somites 1-4). (A) Representative images of neutrophil distribution in the trunk of *kras+* and *kras-* zebrafish larvae under various experimental conditions (from left to right), Control with doxycycline alone, FPR-A14 with doxycycline, PR39 with doxycycline, SB431542 with doxycycline, Mock injected, and Tgf- $\beta$  depletion. (B) Quantification of numbers of neutrophils per somite among different treatment groups. (n=5 fish). NS, no significant difference.

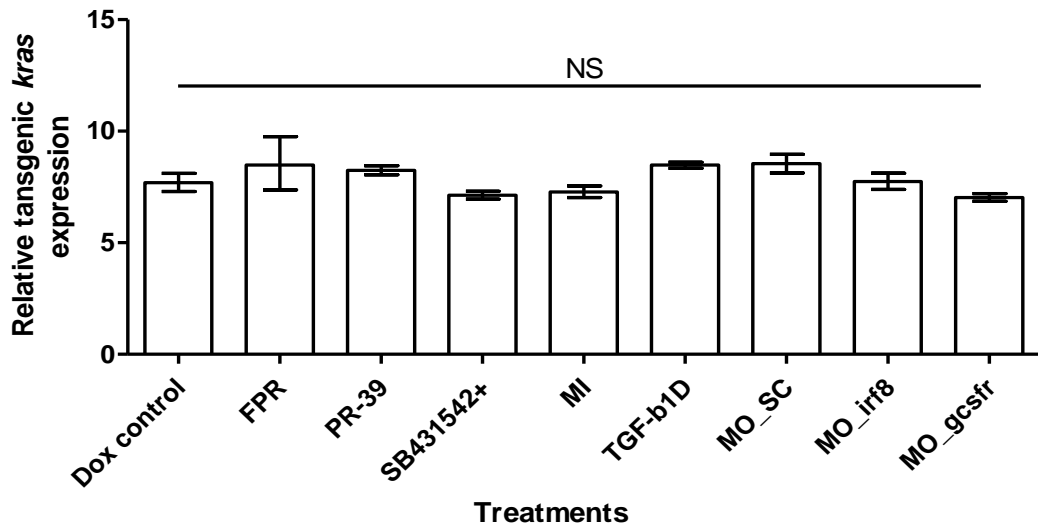

**Supplementary Fig. 5. Lack of significant changes of transgenic *kras* expression under various experimental conditions.** RT-qPCR quantification of *kras-egfp* RNA expression was carried out with total RNAs from 8-dpf *kras+* larvae under various experimental conditions (from left to right): doxycycline alone, FPR-A14 with doxycycline, PR39 with doxycycline, SB431542 with doxycycline, Mock injected, Tgf- $\beta$  depletion, and 6-dpf morphants after injection of MO\_SC, MO\_irf8 and MO\_gcsfr. The level of *egfp-kras* expression was normalized with endogenous  $\beta$ -actin RNA expression. n=10 each group; NS, no significant difference.
